# Supplementary material
Source: Springer Nature journal article supplement (https://www.springermedizin.de/resource/supplementary/13045_2014_400_MOESM5_ESM.pdf/9661292)
Supplement: MOESM5 [file 9661292]

Additional file 5- Nuclear to cytoplasmic ratio of mouse miRNAs during granulopoiesis

| mir-Name        | CT values            |              |           |             |                  |              |           |             |                            |              |             |              |
|-----------------|----------------------|--------------|-----------|-------------|------------------|--------------|-----------|-------------|----------------------------|--------------|-------------|--------------|
|                 | Cytoplasmic Fraction |              |           |             | Nuclear Fraction |              |           |             | Nuclear: Cytoplasmic Ratio |              |             |              |
|                 | LSK                  | Promyelocyte | Myelocyte | Granulocyte | LSK              | Promyelocyte | Myelocyte | Granulocyte | LSK                        | Promyelocyte | Myelocyte   | Granulocyte  |
| mmu-miR-709     | 21.049               | 21.599       | 20.703    | 20.432      | 21.555           | 21.256       | 22.225    | 20.885      | 0.23553894                 | 0.422797133  | 0.116067623 | 0.243507396  |
| mmu-miR-19b     | 20.3323              | 21.1878      | 21.1154   | 21.2049     | 24.6411          | 24.213       | 25.5764   | 24.4784     | 0.01681902                 | 0.040945182  | 0.015135053 | 0.034471252  |
| mmu-miR-17      | 21.0204              | 21.463       | 21.7863   | 21.887      | 25.1568          | 24.4985      | 25.5787   | 24.2492     | 0.01895389                 | 0.040653898  | 0.024057616 | 0.064831443  |
| mmu-miR-690     | 24.118               | 24.052       | 23.513    | 22.999      | 25.3549          | 24.234       | 25.106    | 25.023      | 0.14171236                 | 0.293826719  | 0.110493813 | 0.081958506  |
| mmu-miR-191     | 21.6175              | 22.83        | 22.1722   | 22.0038     | 25.4596          | 25.0738      | 25.4093   | 24.5245     | 0.02324296                 | 0.070376496  | 0.035352045 | 0.058086129  |
| mmu-miR-106a    | 21.9894              | 22.4414      | 22.5541   | 22.811      | 25.9711          | 25.7164      | 26.3459   | 25.6517     | 0.02109928                 | 0.03443543   | 0.024067623 | 0.046531048  |
| mmu-miR-16      | 22.2538              | 23.6211      | 20.6502   | 20.0423     | 25.9768          | 25.798       | 24.0697   | 22.5808     | 0.02524318                 | 0.053628269  | 0.031153488 | 0.057373864  |
| mmu-miR-92a     | 22.3518              | 23.6428      | 24.1653   | 24.3691     | 26.0503          | 26.3162      | 26.8185   | 26.4409     | 0.02567552                 | 0.052252269  | 0.052989029 | 0.079287514  |
| mmu-miR-22      | 21.7698              | 24.3871      | 25.0038   | 24.8264     | 26.0763          | 27.5318      | 28.2841   | 27.5415     | 0.01684586                 | 0.037690311  | 0.034309157 | 0.050763576  |
| mmu-miR-24      | 22.9452              | 24.4297      | 23.2608   | 22.6351     | 26.2455          | 26.8554      | 26.3492   | 25.049      | 0.03383681                 | 0.062039785  | 0.03919022  | 0.062549298  |
| mmu-miR-223     | 21.7887              | 20.3498      | 17.5589   | 16.8299     | 26.3779          | 23.7462      | 22.2864   | 20.3458     | 0.01384815                 | 0.031656323  | 0.012582283 | 0.029139855  |
| mmu-miR-20a     | 22.6429              | 22.8317      | 22.9198   | 23.3082     | 26.7963          | 26.0355      | 27.3615   | 26.307      | 0.01873185                 | 0.036177524  | 0.015338886 | 0.041701338  |
| mmu-miR-142-3p  | 23.5656              | 24.116       | 21.9693   | 22.1849     | 27.9921          | 26.725       | 25.2847   | 23.4185     | 0.02713009                 | 0.054637584  | 0.033484506 | 0.141751656  |
| mmu-miR-29a     | 22.9813              | 25.0681      | 23.8708   | 23.4191     | 27.2518          | 28.4008      | 27.5157   | 25.6875     | 0.0172715                  | 0.033085376  | 0.02664738  | 0.06918665   |
| mmu-miR-484     | 23.9541              | 25.2559      | 23.132    | 22.538      | 27.3194          | 28.0021      | 26.9815   | 25.0846     | 0.03234614                 | 0.049680982  | 0.023124043 | 0.057052642  |
| mmu-miR-19a     | 22.9558              | 23.685       | 23.3958   | 23.1772     | 27.5088          | 26.9004      | 27.9336   | 26.8108     | 0.01420003                 | 0.0358857805 | 0.014350427 | 0.026856917  |
| mmu-miR-26a     | 23.3678              | 25.978       | 23.4862   | 22.8318     | 27.5329          | 28.7977      | 27.6424   | 25.8214     | 0.01858056                 | 0.047213312  | 0.018695534 | 0.041968116  |
| mmu-let-7e      | 24.3271              | 26.5386      | 25.4938   | 25.9586     | 27.659           | 28.5214      | 29.043    | 27.7452     | 0.03310373                 | 0.08433279   | 0.028474958 | 0.067618114  |
| mmu-miR-126-3p  | 23.0787              | 27.4536      | 28.4147   | 28.38       | 27.9921          | 30.9618      | 32.5924   | 30.2257     | 0.01106109                 | 0.029295379  | 0.018418987 | 0.092740126  |
| mmu-miR-30b     | 23.9855              | 25.7111      | 23.9361   | 23.1996     | 28.0337          | 28.9623      | 27.5402   | 26.0703     | 0.0201488                  | 0.03500822   | 0.027411736 | 0.045573453  |
| mmu-miR-378     | 23.968               | 24.584       | 25.483    | 26.286      | 28.041           | 28.215       | 30.093    | 28.926      | 0.0198054                  | 0.026905361  | 0.013649931 | 0.05476079   |
| mmu-miR-30c     | 23.8195              | 25.7939      | 23.9648   | 23.5957     | 28.0435          | 28.4398      | 27.5392   | 26.1903     | 0.01783726                 | 0.053257832  | 0.027981895 | 0.05518567   |
| mmu-miR-706     | 28.86                | 29.117       | 28.698    | 27.188      | 28.087           | 26.617       | 28.88     | 28.197      | 0.56960649                 | 1.885618083  | 0.293826719 | 0.165630182  |
| mmu-miR-374     | 23.668               | 24.734       | 25.012    | 25.389      | 28.339           | 27.605       | 30.999    | 28.545      | 0.01308482                 | 0.045563977  | 0.005255477 | 0.037396522  |
| mmu-miR-155     | 24.9183              | 27.9894      | 29.4906   | 31.1816     | 28.3517          | 30.2095      | 33.4423   | 34.7241     | 0.03085477                 | 0.141026433  | 0.02154262  | 0.028607505  |
| mmu-let-7g      | 24.375               | 26.1648      | 24.4222   | 24.0958     | 28.5565          | 28.0894      | 28.7336   | 26.6287     | 0.01837054                 | 0.087804428  | 0.016788737 | 0.057597001  |
| mmu-miR-146a    | 23.7733              | 28.5178      | 25.8689   | 27.2265     | 28.6363          | 30.9923      | 30.8941   | 29.8792     | 0.01145433                 | 0.059973348  | 0.010236295 | 0.0603007397 |
| mmu-miR-140     | 24.8526              | 26.474       | 24.3022   | 23.6969     | 28.7586          | 29.2126      | 28.1987   | 26.1423     | 0.02223594                 | 0.049946388  | 0.022382849 | 0.05119839   |
| mmu-miR-26b     | 24.3165              | 27.1548      | 23.99     | 23.172      | 28.8272          | 30.1285      | 27.9419   | 26.0292     | 0.01462254                 | 0.042433206  | 0.021539633 | 0.046001908  |
| mmu-miR-196b    | 25.1373              | 29.3817      | 33.6549   | 32.7207     | 28.8547          | 31.4708      | 40        | 40          | 0.02534136                 | 0.07834242   | 0.004100278 | 0.062154809  |
| mmu-miR-30e     | 25.1989              | 27.1459      | 25.8025   | 25.7197     | 28.9673          | 30.2463      | 28.9978   | 27.9876     | 0.02446117                 | 0.035885597  | 0.036391303 | 0.009210632  |
| mmu-miR-15b     | 25.5832              | 26.7096      | 24.1508   | 24.1211     | 29.0852          | 28.8269      | 27.6094   | 26.3729     | 0.02942197                 | 0.076825949  | 0.030320503 | 0.069987326  |
| mmu-miR-20b     | 25.7618              | 27.008       | 28.4028   | 28.8495     | 29.3027          | 30.8014      | 33.9656   | 31.928      | 0.02863925                 | 0.024040946  | 0.007051948 | 0.039460075  |
| mmu-miR-135a*   | 27.664               | 28.136       | 27.639    | 27.649      | 29.338           | 29.377       | 29.013    | 28.112      | 0.10446109                 | 0.141026433  | 0.128606681 | 0.241825368  |
| mmu-miR-93      | 24.4857              | 24.8895      | 23.2559   | 23.4798     | 29.3809          | 28.2211      | 27.7962   | 26.4484     | 0.01120151                 | 0.033110612  | 0.014325581 | 0.042583475  |
| mmu-miR-29c     | 25.5342              | 28.1025      | 26.4836   | 25.7662     | 29.5006          | 31.5616      | 30.701    | 27.9091     | 0.02132423                 | 0.030309997  | 0.017919044 | 0.07547473   |
| mmu-let-7i      | 25.0966              | 26.366       | 25.7818   | 25.7885     | 29.5601          | 28.9023      | 30.0075   | 28.8162     | 0.01510885                 | 0.057641422  | 0.01781625  | 0.040874291  |
| mmu-miR-467a*   | 29.306               | 30.754       | 30.581    | 28.271      | 29.662           | 28.815       | 31.858    | 30.663      | 0.26044263                 | 1.278132585  | 0.137550901 | 0.063506035  |
| mmu-miR-93*     | 25.429               | 26.453       | 25.662    | 26.19       | 29.797           | 30.881       | 30.366    | 28.987      | 0.01614283                 | 0.015485239  | 0.012788913 | 0.047962062  |
| mmu-miR-150     | 24.1423              | 29.6036      | 25.3172   | 26.4567     | 29.8922          | 32.3733      | 29.8152   | 29.5635     | 0.00619422                 | 0.048878286  | 0.014751827 | 0.038693566  |
| mmu-miR-328     | 26.9547              | 28.617       | 27.4825   | 26.4567     | 29.9756          | 31.4928      | 30.0211   | 28.7345     | 0.0410674                  | 0.045412633  | 0.057369888 | 0.068737324  |
| mmu-miR-106b    | 25.3218              | 26.3962      | 25.4874   | 25.2577     | 30.0839          | 29.8886      | 29.1833   | 27.8009     | 0.01228411                 | 0.0296184    | 0.025721837 | 0.051872562  |
| mmu-miR-203     | 26.016               | 30.3413      | 30.9769   | 30.8906     | 30.1232          | 40           | 37.3541   | 32.5804     | 0.01934142                 | 0.000412402  | 0.004010054 | 0.103323298  |
| mmu-miR-877*    | 28.945               | 29.231       | 28.894    | 29.596      | 30.262           | 31.369       | 40        | 33.007      | 0.13378956                 | 0.07573151   | 0.000151231 | 0.031337578  |
| mmu-let-7d      | 26.7381              | 27.9427      | 28.2943   | 28.9079     | 30.3298          | 30.7216      | 31.146    | 30.7642     | 0.02764836                 | 0.048567583  | 0.046177616 | 0.092061228  |
| mmu-miR-760     | 30.773               | 30.39        | 31.301    | 30.609      | 30.618           | 29.809       | 32.058    | 31.438      | 0.3602418                  | 0.498628586  | 0.197241837 | 0.067369764  |
| mmu-miR-101b    | 26.201               | 27.145       | 27.606    | 28.638      | 30.631           | 31.021       | 34.754    | 30.889      | 0.01546379                 | 0.022703169  | 0.002350262 | 0.070026146  |
| mmu-miR-30a     | 25.8018              | 28.0745      | 26.2458   | 26.5641     | 30.7485          | 31.5962      | 30.7158   | 28.7654     | 0.01808871                 | 0.02902294   | 0.015040929 | 0.072480539  |
| mmu-miR-126-5p  | 24.7834              | 29.0801      | 30.3579   | 29.6498     | 30.9296          | 32.7208      | 36.3005   | 31.6185     | 0.00470639                 | 0.026725069  | 0.004621053 | 0.085161047  |
| mmu-miR-125b-5p | 26.9582              | 30.3955      | 31.324    | 33.0094     | 30.9499          | 34.9873      | 33.1714   | 33.5701     | 0.02095354                 | 0.01382322   | 0.09263091  | 0.225991043  |
| mmu-miR-320     | 27.4347              | 29.4176      | 29.2999   | 29.612      | 31.016           | 31.7286      | 31.5271   | 31.4649     | 0.02784839                 | 0.067173569  | 0.071190942 | 0.092278445  |
| mmu-miR-340-5p  | 26.8334              | 28.061       | 25.2153   | 24.3687     | 31.0827          | 30.5887      | 29.8504   | 27.4066     | 0.017552718                | 0.057804976  | 0.013414504 | 0.0405866324 |
| mmu-miR-30d     | 26.4424              | 28.6008      | 27.0477   | 27.4724     | 31.1008          | 32.3871      | 31.2142   | 30.5693     | 0.0131996                  | 0.024159552  | 0.018562534 | 0.03896      |
| mmu-miR-25      | 27.1045              | 28.3196      | 27.5742   | 27.3563     | 31.1639          | 30.9382      | 31.113    | 29.9524     | 0.01999298                 | 0.054275221  | 0.028680967 | 0.055128322  |
| mmu-let-7c      | 26.9458              | 28.9004      | 28.6403   | 29.1658     | 31.2279          | 31.2024      | 32.5316   | 31.3515     | 0.01713319                 | 0.067593993  | 0.022463671 | 0.03268531   |
| mmu-miR-195     | 27.2015              | 28.7738      | 26.0695   | 24.3101     | 31.3148          | 30.693       | 29.5853   | 27.6452     | 0.01925981                 | 0.088133695  | 0.029141875 | 0.033030383  |
| mmu-miR-744     | 27.9324              | 28.983       | 27.1911   | 26.6223     | 31.6225          | 32.2509      | 30.0142   | 28.3172     | 0.02582545                 | 0.034605317  | 0.047102175 | 0.102958689  |
| mmu-miR-7a*     | 27.252               | 28.37        | 27.362    | 27.976      | 31.6326          | 31.795       | 32.447    | 30.793      | 0.01596479                 | 0.031034947  | 0.009820672 | 0.02031754   |
| mmu-miR-31      | 29.4424              | 32.9522      | 29.326    | 34.2532     | 31.7498          | 35.321       | 31.6541   | 40          | 0.0673414                  | 0.064535532  | 0.066382073 | 0.006207541  |
| mmu-miR-130a    | 27.6072              | 30.8395      | 32.6682   | 33.685      | 31.7789          | 35.4874      | 40        | 34.2714     | 0.01849575                 | 0.013296013  | 0.002069126 | 0.222000911  |
| mmu-let-7b      | 28.7835              | 30.4957      | 31.0644   | 30.658      | 31.7807          | 33.4042      | 32.7641   | 32.0187     | 0.04174761                 | 0.044394892  | 0.026167604 | 0.1297977    |
| mmu-miR-148a    | 28.3028              | 28.3433      | 27.7608   | 27.4033     | 31.8118          | 31.0153      | 31.3992   | 29.9565     | 0.02927956                 | 0.052303     | 0.026767709 | 0.056792235  |
| mmu-miR-30e*    | 26.67                | 27.93        | 26.682    | 26.867      | 31.827           | 32.712       | 31.46     | 29.814      | 0.00934258                 | 0.012115834  | 0.012149473 | 0.043225831  |
| mmu-miR-301a    | 29.2922              | 29.732       | 27.474    | 26.9884     | 31.9682          | 32.1119      | 31.1012   | 29.4397     | 0.05215819                 | 0.064040905  | 0.026976323 | 0.060948626  |
| mmu-miR-322     | 27.4961              | 29.9939      | 27.7326   | 27.5927     | 32.0023          | 33.3806      | 31.5017   | 29.7388     | 0.01466822                 | 0.031869882  | 0.024449309 | 0.075307507  |
| mmu-miR-467b*   | 31.779               | 32.475       | 32.809    | 30.214      | 32.115           | 31.693       | 32.504    | 31.943      | 0.26407827                 | 0.573170991  | 0.411806212 | 0.10055366   |
| mmu-miR-331-3p  | 27.6022              | 30.0662      | 29.5357   | 29.2402     | 32.1171          | 33.2897      | 35.113    | 31.5108     | 0.01458003                 | 0.034233141  | 0.006981426 | 0.069081226  |
| mmu-miR-125a-5p | 27.2273              | 34.9389      | 33.9711   | 35.2298     | 32.119           | 40           | 35.4149   | 40          | 0.01122872                 | 0.009984719  | 0.122532597 | 0.012215337  |
| mmu-miR-139-5p  | 27.0946              | 27.9646      | 22.5182   | 21.7069     | 32.1403          | 31.1046      | 26.7854   | 24.5334     | 0.01009187                 | 0.037813298  | 0.017311055 | 0.0469913    |
| mmu-miR-221     | 26.8785              |              |           |             |                  |              |           |             |                            |              |             |              |

|                 |         |         |         |         |         |         |         |         |            |              |             |             |
|-----------------|---------|---------|---------|---------|---------|---------|---------|---------|------------|--------------|-------------|-------------|
| mmu-miR-425*    | 29.572  | 29.7    | 30.108  | 30.592  | 32.851  | 32.101  | 32.893  | 32.724  | 0.03434009 | 0.063111096  | 0.048362663 | 0.076047124 |
| mmu-miR-130b    | 27.7916 | 28.5559 | 29.9365 | 29.8783 | 33.0105 | 31.7178 | 32.9666 | 31.2192 | 0.00895021 | 0.03724363   | 0.04080635  | 0.131591435 |
| mmu-miR-297a*   | 31.77   | 32.616  | 34.204  | 30.251  | 33.155  | 31.548  | 32.442  | 31.612  | 0.12762983 | 0.69884165   | 1.130559953 | 0.129770782 |
| mmu-miR-494     | 30.3912 | 29.9902 | 28.438  | 29.6052 | 33.1616 | 29.8733 | 32.3621 | 31.8497 | 0.04885458 | 0.361467414  | 0.021958716 | 0.070342358 |
| mmu-miR-24-2*   | 29.021  | 30.377  | 27.918  | 28.545  | 33.187  | 35.173  | 34.007  | 31.938  | 0.01856897 | 0.01199883   | 0.004896741 | 0.031731015 |
| mmu-miR-652     | 26.4738 | 27.735  | 25.0178 | 24.5715 | 33.227  | 33.3724 | 30.3567 | 28.2581 | 0.00309003 | 0.006696567  | 0.008235874 | 0.025888183 |
| mmu-miR-342-3p  | 27.9647 | 30.3673 | 28.2328 | 29.32   | 33.2557 | 32.5568 | 32.8212 | 32.2772 | 0.00851391 | 0.073075799  | 0.013855835 | 0.042912197 |
| mmu-miR-224     | 29.5089 | 36.7061 | 40      | 40      | 33.2693 | 40      | 40      | 40      | 0.02459719 | 0.033987251  | 0.333333333 | 0.333333333 |
| mmu-miR-30a*    | 27.943  | 30.167  | 29.338  | 30.482  | 33.301  | 32.466  | 32.895  | 32.375  | 0.00812756 | 0.067734633  | 0.028321422 | 0.089748865 |
| mmu-miR-674*    | 29.681  | 29.667  | 30.436  | 31.081  | 33.327  | 33.388  | 33.331  | 33.13   | 0.02662707 | 0.0348178199 | 0.044812266 | 0.050950508 |
| mmu-miR-188-5p  | 31.9629 | 32.9698 | 31.1746 | 31.96   | 33.3434 | 32.9636 | 31.6634 | 33.5023 | 0.12802855 | 0.33476892   | 0.237539197 | 0.114445885 |
| mmu-miR-301b    | 28.7046 | 28.8977 | 26.9685 | 26.6517 | 33.35   | 30.2625 | 30.8524 | 28.6499 | 0.01331907 | 0.129429421  | 0.022579189 | 0.08343737  |
| mmu-miR-331-5p  | 35.8779 | 40      | 40      | 40      | 33.364  | 35.257  | 33.3407 | 40      | 1.90387334 | 0.926146589  | 33.69207784 | 0.333333333 |
| mmu-miR-879*    | 34.576  | 40      | 40      | 40      | 33.481  | 40      | 40      | 40      | 0.71204361 | 0.333333333  | 0.333333333 | 0.333333333 |
| mmu-miR-667     | 40      | 34.8764 | 32.6891 | 33.2164 | 33.5375 | 32.6348 | 40      | 40      | 29.395787  | 1.576404201  | 0.00209932  | 0.003025601 |
| mmu-miR-101a    | 29.0553 | 30.184  | 31.1185 | 31.5983 | 33.575  | 34.8878 | 34.3709 | 37.1481 | 0.0145316  | 0.012790680  | 0.034979113 | 0.007115779 |
| mmu-miR-674     | 31.8962 | 40      | 33.5729 | 34.8117 | 33.5953 | 40      | 40      | 40      | 0.10265939 | 0.333333333  | 0.003873726 | 0.009142076 |
| mmu-miR-107     | 31.0987 | 40      | 33.3585 | 40      | 33.6406 | 40      | 33.7373 | 40      | 0.05723881 | 0.333333333  | 0.256359008 | 0.333333333 |
| mmu-miR-700     | 31.714  | 33.185  | 30.701  | 31.831  | 33.653  | 35.166  | 33.987  | 33.582  | 0.08693238 | 0.084438075  | 0.034173871 | 0.099031925 |
| mmu-miR-27b     | 28.9134 | 28.8566 | 29.0116 | 29.6346 | 33.6569 | 31.5933 | 35.098  | 31.4924 | 0.01244351 | 0.050009206  | 0.004905573 | 0.091965556 |
| mmu-miR-21*     | 35.635  | 33.439  | 36.817  | 36.151  | 33.756  | 34.692  | 40      | 34.995  | 1.22606673 | 0.139858273  | 0.036702891 | 0.742795767 |
| mmu-miR-18a     | 29.1798 | 27.7036 | 28.3486 | 28.3147 | 33.7826 | 30.5274 | 32.521  | 31.0957 | 0.01371822 | 0.047079327  | 0.018486777 | 0.048496939 |
| mmu-miR-671-3p  | 31.4071 | 32.4674 | 31.5758 | 32.1273 | 33.7836 | 34.4199 | 33.5366 | 33.6818 | 0.06419201 | 0.086122708  | 0.085628656 | 0.113482166 |
| mmu-miR-15b*    | 27.55   | 27.872  | 25.418  | 25.904  | 33.785  | 29.93   | 30.524  | 29.523  | 0.00442544 | 0.080049572  | 0.009678757 | 0.027130087 |
| mmu-miR-503*    | 30.407  | 32.682  | 30.511  | 30.291  | 33.884  | 35.162  | 34.586  | 33.866  | 0.02993625 | 0.059748135  | 0.019777961 | 0.021797026 |
| mmu-miR-532-5p  | 31.4072 | 29.6588 | 27.2933 | 26.7775 | 33.9081 | 33.8524 | 36.3567 | 31.8352 | 0.05888882 | 0.018217105  | 0.000623051 | 0.010008277 |
| mmu-miR-18a*    | 30.868  | 29.256  | 31.778  | 31.195  | 33.917  | 34.58   | 34.494  | 40      | 0.04027525 | 0.008321374  | 0.050731917 | 0.000745263 |
| mmu-miR-103     | 28.2437 | 29.8793 | 28.7277 | 28.2023 | 33.9574 | 40      | 33.1526 | 30.3947 | 0.00635161 | 0.002099399  | 0.015518549 | 0.072929054 |
| mmu-miR-99b     | 29.9871 | 36.8118 | 40      | 37.1575 | 34.0424 | 40      | 40      | 40      | 0.02004988 | 0.036570838  | 0.333333333 | 0.046473029 |
| mmu-miR-339-5p  | 31.1818 | 31.8164 | 30.9697 | 31.1478 | 34.1006 | 40      | 36.6805 | 36.2254 | 0.04407907 | 0.001146488  | 0.006364388 | 0.009871175 |
| mmu-miR-98      | 30.5037 | 31.4575 | 30.2238 | 30.2134 | 34.1078 | 34.9763 | 35.6482 | 32.7636 | 0.02741174 | 0.009818139  | 0.007761964 | 0.056910454 |
| mmu-miR-29b     | 30.7753 | 32.0856 | 30.7789 | 31.0736 | 34.2285 | 35.4744 | 33.9805 | 32.5028 | 0.03043421 | 0.031823526  | 0.036232734 | 0.123778916 |
| mmu-miR-324-3p  | 30.1461 | 32.3857 | 32.7212 | 31.9017 | 34.3492 | 40      | 40      | 40      | 0.01809754 | 0.001701163  | 0.002146553 | 0.001216319 |
| mmu-miR-455*    | 34.532  | 40      | 40      | 40      | 34.391  | 40      | 40      | 33.679  | 0.36755639 | 0.333333333  | 0.333333333 | 26.64951735 |
| mmu-miR-322*    | 29.387  | 32.89   | 28.787  | 29.09   | 34.458  | 35.439  | 36.34   | 33.838  | 0.00991644 | 0.05695781   | 0.001775003 | 0.012404759 |
| mmu-miR-149     | 28.425  | 26.323  | 24.148  | 25.262  | 34.5    | 31.289  | 28.634  | 28.397  | 0.00494449 | 0.010665072  | 0.014875041 | 0.037944576 |
| mmu-miR-340-3p  | 28.7298 | 30.2838 | 27.5554 | 26.2755 | 34.5137 | 35.5376 | 31.6481 | 29.6863 | 0.00604994 | 0.008736296  | 0.019536793 | 0.031341923 |
| mmu-miR-191*    | 34.515  | 32.486  | 35.681  | 34.604  | 34.52   | 34.152  | 40      | 40      | 0.33218009 | 0.105041949  | 0.016700528 | 0.007916275 |
| mmu-miR-15a     | 30.3671 | 31.6195 | 28.5836 | 29.0231 | 34.5365 | 40      | 33.8913 | 31.0349 | 0.01852526 | 0.001000223  | 0.008415925 | 0.082654518 |
| mmu-miR-450a-5p | 31.2726 | 34.1701 | 31.7909 | 32.6809 | 34.6019 | 40      | 40      | 40      | 0.03316344 | 0.005860086  | 0.001126402 | 0.002087421 |
| mmu-miR-146b*   | 33.811  | 33.084  | 34.269  | 36.603  | 34.617  | 34.918  | 40      | 40      | 0.19065516 | 0.09349529   | 0.006275897 | 0.03164316  |
| mmu-miR-23b     | 31.2913 | 31.6358 | 32.2179 | 31.7653 | 34.6535 | 40      | 40      | 40      | 0.03241572 | 0.004011158  | 0.001514374 | 0.001106591 |
| mmu-miR-764-5p  | 35.782  | 33.438  | 33.961  | 35.525  | 34.764  | 36.359  | 37.078  | 35.182  | 0.67503654 | 0.040411980  | 0.038420963 | 0.422797133 |
| mmu-miR-16*     | 30.984  | 30.314  | 29.48   | 30.65   | 34.771  | 36.464  | 37.421  | 33.937  | 0.02414783 | 0.004694013  | 0.001356437 | 0.034150192 |
| mmu-miR-152     | 29.5778 | 32.8787 | 32.7217 | 40      | 34.7757 | 40      | 40      | 40      | 0.00908144 | 0.002394164  | 0.002147297 | 0.333333333 |
| mmu-miR-574-3p  | 40      | 28.7798 | 27.5965 | 26.3879 | 34.8043 | 31.5311 | 32.4491 | 40      | 12.216317  | 0.049050667  | 0.011537204 | 2.66212E-05 |
| mmu-let-7g*     | 34.339  | 35.975  | 33.922  | 35.489  | 34.818  | 32.744  | 34.297  | 40      | 0.23915826 | 3.129728475  | 0.257035138 | 0.014619497 |
| mmu-miR-365     | 31.0787 | 40      | 30.4013 | 29.3906 | 34.8208 | 38.2348 | 35.8297 | 31.5951 | 0.02491119 | 1.133070398  | 0.007740473 | 0.07231995  |
| mmu-miR-296-5p  | 31.3642 | 31.2618 | 29.5349 | 29.6729 | 34.8554 | 33.9538 | 33.2661 | 32.582  | 0.02964305 | 0.015182929  | 0.025100011 | 0.04376432  |
| mmu-miR-33*     | 29.392  | 32.189  | 30.997  | 30.053  | 34.857  | 36.949  | 34.421  | 33.352  | 0.00754657 | 0.012302007  | 0.031056466 | 0.033867317 |
| mmu-miR-872     | 29.7369 | 32.5034 | 33.5469 | 31.6725 | 34.859  | 33.0208 | 33.4397 | 36.6972 | 0.00957135 | 0.232876586  | 0.35904523  | 0.010239844 |
| mmu-miR-20a*    | 28.113  | 30.648  | 30.363  | 31.083  | 34.88   | 34.511  | 40      | 34.285  | 0.00306062 | 0.02290867   | 0.000418652 | 0.03622269  |
| mmu-miR-142-5p  | 30.0843 | 30.9562 | 28.6391 | 28.3794 | 34.9084 | 40      | 32.9965 | 31.5118 | 0.01176738 | 0.000631573  | 0.016261876 | 0.038013021 |
| mmu-let-7d*     | 31.621  | 32.908  | 34.877  | 40      | 34.981  | 40      | 38.295  | 36.379  | 0.03246519 | 0.002443284  | 0.031185896 | 4.10117555  |
| mmu-miR-193*    | 33.683  | 34.987  | 30.597  | 31.263  | 35.058  | 40      | 33.557  | 32.788  | 0.12851757 | 0.010323225  | 0.042838076 | 0.115826518 |
| mmu-miR-299*    | 40      | 40      | 40      | 40      | 35.15   | 36.715  | 40      | 40      | 9.61333827 | 3.249094036  | 0.333333333 | 0.333333333 |
| mmu-miR-185     | 31.4475 | 31.8276 | 30.947  | 30.1177 | 35.1933 | 35.6075 | 34.6459 | 35.6624 | 0.02484738 | 0.024266965  | 0.025668406 | 0.007140979 |
| mmu-miR-503     | 30.2249 | 31.5445 | 29.0715 | 28.556  | 35.1943 | 36.3348 | 35.1932 | 32.6194 | 0.01063997 | 0.010240633  | 0.0044787   | 0.009937627 |
| mmu-miR-324-5p  | 33.0034 | 32.6831 | 34.5174 | 34.1024 | 35.2287 | 40      | 36.0466 | 33.7806 | 0.07128476 | 0.002090607  | 0.115489812 | 0.416629673 |
| mmu-miR-369-5p  | 40      | 40      | 40      | 40      | 35.252  | 40      | 40      | 40      | 8.95713592 | 0.333333333  | 0.333333333 | 0.333333333 |
| mmu-miR-26b*    | 32.118  | 32.808  | 30.25   | 29.783  | 35.44   | 38.535  | 34.926  | 33.818  | 0.03333167 | 0.006393322  | 0.013039546 | 0.020333995 |
| mmu-miR-206     | 35.937  | 36.47   | 34.132  | 33.98   | 35.501  | 35.278  | 35.067  | 33.578  | 0.45094941 | 0.761564165  | 0.17434749  | 0.440446135 |
| mmu-miR-744*    | 33.535  | 34.333  | 30.732  | 30.412  | 35.775  | 33.205  | 33.734  | 31.314  | 0.07056211 | 0.728518493  | 0.041608944 | 0.17838145  |
| mmu-let-7a*     | 31.997  | 31.938  | 32.961  | 33.176  | 35.805  | 36.394  | 36.156  | 35.289  | 0.02379888 | 0.015187598  | 0.036398871 | 0.077055273 |
| mmu-miR-467a    | 30.2335 | 31.0111 | 31.6947 | 28.0668 | 35.8923 | 34.53   | 34.5662 | 30.3764 | 0.00659797 | 0.029079323  | 0.045548189 | 0.067238787 |
| mmu-miR-15a*    | 29.739  | 31.173  | 28.579  | 29.005  | 35.9    | 34.172  | 32.452  | 31.493  | 0.00465836 | 0.041695558  | 0.022750428 | 0.059417738 |
| mmu-miR-326     | 33.118  | 35.948  | 33.362  | 32.801  | 35.953  | 40      | 35.06   | 34.576  | 0.04671525 | 0.020095796  | 0.102737694 | 0.097398104 |
| mmu-miR-351     | 31.9156 | 34.4826 | 32.5977 | 33.907  | 35.965  | 40      | 35.5339 | 40      | 0.02013204 | 0.007277393  | 0.043550633 | 0.004883183 |
| mmu-miR-192     | 30.1915 | 31.6425 | 28.049  | 27.7311 | 36.0352 | 34.0501 | 33.5543 | 30.7792 | 0.0058043  | 0.062823037  | 0.007338686 | 0.040300387 |
| mmu-miR-704     | 33.416  | 32.118  | 31.758  | 32.761  | 36.097  | 34.622  | 37.833  | 35.827  | 0.05197773 | 0.058762415  | 0.00494449  | 0.039803456 |
| mmu-miR-761     | 40      | 40      | 40      | 40      | 36.177  | 40      | 40      | 40      | 4.71754899 | 0.333333333  | 0.333333333 | 0.333333333 |
| mmu-miR-721     | 33.582  | 35.933  | 38.92   | 36.814  | 36.256  | 35.666  | 34.748  | 36.419  | 0.05223054 | 0.401110109  | 0.008635885 | 0.438314253 |
| mmu-miR-199a-3p | 32.3587 | 35.0136 | 33.1778 | 33.373  | 36.3242 | 35.7616 | 40      | 34.0453 | 0.02133754 | 0.198476142  | 0.002945723 | 0.209168499 |
| mmu-miR-125b*   | 33.629  | 38.388  | 37.026  | 40      | 36.3    |         |         |         |            |              |             |             |

|                 |         |         |         |         |         |         |         |         |             |             |             |             |
|-----------------|---------|---------|---------|---------|---------|---------|---------|---------|-------------|-------------|-------------|-------------|
| mmu-miR-28      | 30.1992 | 32.5052 | 31.524  | 30.2613 | 37.6871 | 40      | 40      | 31.9544 | 0.00185693  | 0.001848073 | 0.000936157 | 0.103082728 |
| mmu-miR-186*    | 31.524  | 34.035  | 31.003  | 32.083  | 37.86   | 40      | 34.722  | 36.5    | 0.00412622  | 0.005336233 | 0.025313266 | 0.01560376  |
| mmu-miR-294     | 40      | 37.8906 | 40      | 37.3332 | 38.1218 | 39.3356 | 40      | 38.6108 | 1.22538704  | 0.122430719 | 0.333333333 | 0.137493708 |
| mmu-miR-29c*    | 33.972  | 40      | 35.13   | 33.19   | 39.924  | 40      | 35.156  | 40      | 0.00538454  | 0.333333333 | 0.327379865 | 0.002970739 |
| mmu-miR-590-5p  | 35.6278 | 40      | 40      | 40      | 39.9505 | 40      | 40      | 40      | 0.01665775  | 0.333333333 | 0.333333333 | 0.333333333 |
| mmu-miR-696     | 40      | 40      | 40      | 40      | 40      | 29.801  | 40      | 40      | 0.333333333 | 391.8173573 | 0.333333333 | 0.333333333 |
| mmu-miR-425     | 27.9643 | 28.93   | 28.2622 | 27.6068 | 40      | 32.1531 | 40      | 30.4625 | 7.9391E-05  | 0.035696774 | 0.75998E-05 | 0.046049762 |
| mmu-miR-124     | 40      | 40      | 40      | 40      | 40      | 32.2933 | 40      | 32.96   | 0.333333333 | 69.63484494 | 0.333333333 | 43.86618994 |
| mmu-miR-680     | 34.6746 | 36.2639 | 40      | 33.8764 | 40      | 32.9151 | 40      | 37.1171 | 0.00831333  | 3.396002449 | 0.333333333 | 0.03526394  |
| mmu-miR-339-3p  | 30.9585 | 32.3243 | 31.2382 | 31.1933 | 40      | 32.9275 | 40      | 32.8316 | 0.00063258  | 0.219430732 | 0.000767917 | 0.10707826  |
| mmu-miR-105     | 40      | 40      | 40      | 40      | 40      | 33.3834 | 40      | 40      | 0.333333333 | 32.70949315 | 0.333333333 | 0.333333333 |
| mmu-miR-451     | 40      | 40      | 40      | 33.3398 | 40      | 33.6612 | 40      | 40      | 0.333333333 | 26.98035637 | 0.333333333 | 0.003295784 |
| mmu-miR-24-1*   | 40      | 40      | 40      | 40      | 40      | 33.674  | 40      | 40      | 0.333333333 | 26.74203777 | 0.333333333 | 0.333333333 |
| mmu-miR-190b    | 33.41   | 33.828  | 32.121  | 31.007  | 40      | 34.072  | 33.35   | 34.122  | 0.00346012  | 0.281466962 | 0.14220435  | 0.038474263 |
| mmu-miR-350     | 32.0779 | 34.9018 | 30.7401 | 30.6189 | 40      | 34.2205 | 36.8427 | 31.9034 | 0.00137432  | 0.534528027 | 0.004850797 | 0.136837684 |
| mmu-miR-673-5p  | 35.687  | 35.544  | 35.858  | 35.823  | 40      | 34.277  | 35.769  | 36.289  | 0.01677013  | 0.802202017 | 0.354544224 | 0.241323029 |
| mmu-miR-677     | 40      | 40      | 40      | 40      | 40      | 34.6801 | 40      | 40      | 0.333333333 | 13.31460293 | 0.333333333 | 0.333333333 |
| mmu-miR-470*    | 37.41   | 35.398  | 35.292  | 34.668  | 40      | 34.7    | 40      | 39.305  | 0.05536191  | 0.540751437 | 0.012753504 | 0.013396489 |
| mmu-miR-145     | 36.4334 | 36.2997 | 37.7372 | 33.3274 | 40      | 34.7575 | 40      | 40      | 0.02813359  | 0.970942671 | 0.069455729 | 0.003267578 |
| mmu-miR-763     | 40      | 37.309  | 40      | 40      | 40      | 34.768  | 40      | 40      | 0.333333333 | 1.939974245 | 0.333333333 | 0.333333333 |
| mmu-miR-135a    | 33.2792 | 32.5418 | 28.4207 | 27.0401 | 40      | 34.7714 | 33.0831 | 30.0611 | 0.00316021  | 0.10762611  | 0.013163049 | 0.041064556 |
| mmu-miR-7a      | 36.1924 | 40      | 35.3622 | 32.9866 | 40      | 34.9443 | 40      | 40      | 0.02380548  | 11.08654169 | 0.013389422 | 0.002580091 |
| mmu-miR-467c    | 31.8375 | 34.0483 | 34.4851 | 30.131  | 40      | 35.0874 | 34.2324 | 32.8213 | 0.00116338  | 0.162210318 | 0.397144932 | 0.051643747 |
| mmu-miR-466d-5p | 40      | 40      | 40      | 40      | 40      | 35.702  | 40      | 40      | 0.333333333 | 6.557007292 | 0.333333333 | 0.333333333 |
| mmu-miR-682     | 31.8451 | 31.442  | 40      | 34.6033 | 40      | 35.7496 | 35.0959 | 34.4848 | 0.00116952  | 0.016833016 | 9.980675761 | 0.361868516 |
| mmu-miR-7b      | 34.6829 | 36.0895 | 34.0555 | 33.3718 | 40      | 35.8007 | 40      | 36.7897 | 0.00836127  | 0.407207912 | 0.0054126   | 0.031188057 |
| mmu-miR-335-3p  | 40      | 40      | 40      | 40      | 40      | 36.0736 | 40      | 40      | 0.333333333 | 5.068073682 | 0.333333333 | 0.333333333 |
| mmu-miR-467d    | 35.9954 | 34.7478 | 40      | 32.1562 | 40      | 36.08   | 40      | 36.1932 | 0.02076701  | 0.132387333 | 0.333333333 | 0.020305826 |
| mmu-miR-881*    | 40      | 40      | 36.526  | 36.431  | 40      | 36.257  | 40      | 40      | 0.333333333 | 4.463073294 | 0.029998569 | 0.028086828 |
| mmu-miR-27a*    | 30.914  | 30.298  | 29.401  | 29.147  | 40      | 36.614  | 40      | 34.244  | 0.00061337  | 0.004183823 | 0.000214913 | 0.009739325 |
| mmu-miR-22      | 32.232  | 32.816  | 28.816  | 27.758  | 40      | 36.815  | 35.298  | 30.979  | 0.00152925  | 0.020847779 | 0.003729085 | 0.007488772 |
| mmu-miR-694     | 36.861  | 37.466  | 35.325  | 35.761  | 40      | 36.98   | 40      | 40      | 0.03783952  | 0.466852107 | 0.013048588 | 0.017652759 |
| mmu-miR-410     | 34.6558 | 36.8967 | 40      | 37.0341 | 40      | 37.0524 | 40      | 40      | 0.00820567  | 0.299232324 | 0.333333333 | 0.042663245 |
| mmu-miR-29b*    | 32.644  | 33.307  | 31.882  | 31.719  | 40      | 37.16   | 35.197  | 33.704  | 0.00203471  | 0.023860132 | 0.033493791 | 0.084204287 |
| mmu-let-7c-1*   | 36.915  | 35.749  | 38.861  | 40      | 40      | 37.281  | 40      | 40      | 0.03928269  | 0.115265886 | 0.15135807  | 0.333333333 |
| mmu-miR-138*    | 37.007  | 36.46   | 40      | 36.847  | 40      | 37.928  | 38.218  | 39.046  | 0.04186933  | 0.120494358 | 1.146341982 | 0.072596183 |
| mmu-miR-218-1*  | 38.64   | 34.477  | 40      | 36.676  | 40      | 38.291  | 40      | 40      | 0.12986076  | 0.023703109 | 0.333333333 | 0.034285497 |
| mmu-miR-196a*   | 38.852  | 35.378  | 37.094  | 38.326  | 40      | 38.505  | 40      | 40      | 0.15041679  | 0.03815557  | 0.044471889 | 0.104461085 |
| mmu-miR-434-3p  | 33.3492 | 34.8797 | 36.3579 | 35.8083 | 40      | 38.6868 | 39.0199 | 40      | 0.00331733  | 0.023813731 | 0.052666796 | 0.018241112 |
| mmu-miR-676*    | 34.064  | 36.986  | 40      | 40      | 40      | 38.947  | 40      | 40      | 0.00544458  | 0.085616787 | 0.333333333 | 0.333333333 |
| mmu-miR-338-3p  | 34.8309 | 40      | 33.7315 | 32.2118 | 40      | 39.0381 | 35.4574 | 34.0723 | 0.00926456  | 0.649291172 | 0.100769958 | 0.091793608 |
| mmu-miR-99b     | 34.573  | 37.842  | 40      | 40      | 40      | 39.19   | 38.237  | 40      | 0.00774799  | 0.130945419 | 1.131343869 | 0.333333333 |
| mmu-miR-135b    | 32.4777 | 34.5669 | 29.2955 | 26.4154 | 40      | 40      | 31.6866 | 29.6921 | 0.00181318  | 0.007715297 | 0.063545664 | 0.034394877 |
| mmu-miR-200c    | 32.4302 | 33.8826 | 28.8582 | 28.1033 | 40      | 40      | 32.0913 | 30.23   | 0.00175445  | 0.004801289 | 0.035450198 | 0.076327011 |
| mmu-miR-194     | 31.024  | 33.166  | 29.7149 | 29.4844 | 40      | 40      | 34.3312 | 31.4749 | 0.00066196  | 0.002921728 | 0.013590454 | 0.083888866 |
| mmu-miR-218     | 33.0046 | 40      | 40      | 40      | 40      | 40      | 34.4105 | 35.917  | 0.00261248  | 0.333333333 | 16.0504017  | 5.649184452 |
| mmu-miR-361     | 31.9761 | 40      | 32.8962 | 30.4476 | 40      | 40      | 34.4472 | 33.5111 | 0.00128069  | 0.333333333 | 0.11375781  | 0.03987249  |
| mmu-miR-31*     | 30.158  | 33.509  | 30.776  | 40      | 40      | 40      | 34.738  | 40      | 0.0003632   | 0.003705894 | 0.021389366 | 0.333333333 |
| mmu-miR-133b    | 40      | 40      | 40      | 40      | 40      | 40      | 34.7842 | 40      | 0.333333333 | 0.333333333 | 12.38770905 | 0.333333333 |
| mmu-miR-669a    | 33.2967 | 34.4529 | 34.0454 | 33.2319 | 40      | 40      | 35.2694 | 40      | 0.00319878  | 0.007129109 | 0.142698047 | 0.003058283 |
| mmu-let-7i*     | 34.159  | 34.155  | 37.156  | 40      | 40      | 40      | 35.284  | 40      | 0.00581517  | 0.005799071 | 1.220132224 | 0.333333333 |
| mmu-miR-500     | 33.9803 | 40      | 40      | 33.1843 | 40      | 40      | 35.4285 | 40      | 0.0051377   | 0.333333333 | 7.925695271 | 0.002959025 |
| mmu-miR-1       | 35.1916 | 37.7304 | 35.2127 | 35.3834 | 40      | 40      | 35.8876 | 33.7928 | 0.01189614  | 0.069129126 | 0.208791878 | 1.003915261 |
| mmu-miR-30b*    | 33.974  | 33.633  | 33.15   | 33.666  | 40      | 40      | 36.059  | 40      | 0.00511531  | 0.004038506 | 0.04379508  | 0.004131947 |
| mmu-miR-129-3p  | 40      | 40      | 40      | 32.3283 | 40      | 40      | 40      | 40      | 0.333333333 | 0.333333333 | 0.333333333 | 0.454463867 |
| mmu-miR-147     | 40      | 40      | 31.9068 | 31.7986 | 40      | 40      | 40      | 32.6321 | 0.333333333 | 0.333333333 | 0.001220626 | 0.187055397 |
| mmu-miR-491     | 33.175  | 32.622  | 40      | 32.9545 | 40      | 40      | 40      | 32.7517 | 0.00294001  | 0.002003916 | 0.333333333 | 0.383643309 |
| mmu-miR-345-3p  | 40      | 40      | 40      | 40      | 40      | 40      | 40      | 33.3757 | 0.333333333 | 0.333333333 | 0.333333333 | 32.8843806  |
| mmu-miR-106b*   | 28.433  | 28.315  | 27.092  | 27.341  | 40      | 40      | 40      | 34.066  | 0.00010987  | 0.000101238 | 4.33694E-05 | 0.003151026 |
| mmu-miR-423-5p  | 34.7184 | 40      | 32.9472 | 40      | 40      | 40      | 40      | 34.0687 | 0.00856956  | 0.333333333 | 0.002510582 | 20.34126504 |
| mmu-miR-467e    | 32.9461 | 40      | 40      | 32.6789 | 40      | 40      | 40      | 34.0688 | 0.00250867  | 0.333333333 | 0.333333333 | 0.127197084 |
| mmu-miR-183*    | 40      | 40      | 40      | 40      | 40      | 40      | 40      | 34.165  | 0.333333333 | 0.333333333 | 0.333333333 | 19.02780841 |
| mmu-miR-702     | 35.431  | 33.568  | 33.229  | 35.825  | 40      | 40      | 40      | 34.216  | 0.01404341  | 0.003860591 | 0.003052141 | 1.016801102 |
| mmu-miR-672     | 33.7055 | 40      | 40      | 40      | 40      | 40      | 40      | 34.5076 | 0.00424664  | 0.333333333 | 0.333333333 | 15.00568735 |
| mmu-miR-345-5p  | 32.6073 | 35.6667 | 33.275  | 31.7129 | 40      | 40      | 40      | 34.5233 | 0.0019836   | 0.01653581  | 0.003151026 | 0.047518645 |
| mmu-miR-380-5p  | 40      | 40      | 40      | 40      | 40      | 40      | 40      | 34.5751 | 0.333333333 | 0.333333333 | 0.333333333 | 14.31978076 |
| mmu-miR-34a     | 29.7599 | 40      | 32.7557 | 32.6641 | 40      | 40      | 40      | 34.7868 | 0.00027561  | 0.333333333 | 0.002198503 | 0.076538928 |
| mmu-miR-22*     | 40      | 34.829  | 32.241  | 31.434  | 40      | 40      | 40      | 34.789  | 0.333333333 | 0.009252362 | 0.001538817 | 0.032577902 |
| mmu-miR-335-5p  | 40      | 40      | 40      | 40      | 40      | 40      | 40      | 34.8834 | 0.333333333 | 0.333333333 | 0.333333333 | 11.56455221 |
| mmu-miR-383     | 40      | 40      | 40      | 40      | 40      | 40      | 40      | 34.8912 | 0.333333333 | 0.333333333 | 0.333333333 | 11.50219662 |
| mmu-miR-384-5p  | 36.3723 | 40      | 40      | 40      | 40      | 40      | 40      | 35.5664 | 0.02696697  | 0.333333333 | 0.333333333 | 7.20319769  |
| mmu-miR-878-3p  | 36.303  | 40      | 35.626  | 40      | 40      | 40      | 40      | 35.62   | 0.02570223  | 0.333333333 | 0.016075835 | 6.940498986 |
| mmu-let-7b*     | 40      | 40      | 40      | 40      | 40      | 40      | 40      | 36.052  | 0.333333333 | 0.333333333 | 0.333333333 | 5.144523651 |
| mmu-let-7f*     | 40      | 40      | 40      | 40      | 40      | 40      | 40      | 36.123  | 0.333333333 | 0.333333333 | 0.333333333 | 4.897472866 |
| mmu-miR-362-3p  | 34.293  | 36.2056 | 31.9302 | 33.0535 | 40      | 40      | 40      | 36.3987 | 0.00638117  | 0.024024288 | 0.001240586 | 0.032799952 |
| mmu-miR-19a*    | 40      | 33.4    | 40      | 40      | 40      | 40      | 40      | 37.648  | 0.333333333 | 0.003436219 | 0.333333333 | 1.701771692 |
| mmu-miR-136     | 32.6835 | 40      | 36.1219 | 37.6609 | 40      | 40      | 40      | 38.5096 | 0.00209119  | 0.333333333 | 0.022670146 | 0.185094958 |
| mmu-miR-10a*    | 40      | 35.189  | 40      | 40      | 40      | 40      | 40      | 40      | 0.333333333 | 0.011874722 | 0.333333333 | 0.333333333 |
| mmu-miR-139-3p  | 40      | 40      | 29.5632 | 29.6151 | 40      | 40      | 40      | 40      | 0.333333333 | 0.333333333 | 0.000240485 | 0.000249294 |

|                   |         |         |         |         |         |         |         |         |            |             |             |             |
|-------------------|---------|---------|---------|---------|---------|---------|---------|---------|------------|-------------|-------------|-------------|
| mmu-miR-381       | 40      | 34.6036 | 40      | 40      | 40      | 40      | 40      | 40      | 0.33333333 | 0.007914081 | 0.33333333  | 0.33333333  |
| mmu-miR-466b-3-3p | 40      | 32.508  | 40      | 32.519  | 40      | 40      | 40      | 40      | 0.33333333 | 0.001851663 | 0.33333333  | 0.001865835 |
| mmu-miR-467e*     | 40      | 33.953  | 40      | 33.521  | 40      | 40      | 40      | 40      | 0.33333333 | 0.005041391 | 0.33333333  | 0.003736848 |
| mmu-miR-486       | 40      | 40      | 40      | 33.6425 | 40      | 40      | 40      | 40      | 0.33333333 | 0.33333333  | 0.33333333  | 0.004065187 |
| mmu-miR-495       | 40      | 40      | 40      | 35.2927 | 40      | 40      | 40      | 40      | 0.33333333 | 0.33333333  | 0.33333333  | 0.012759694 |
| mmu-miR-582-5p    | 40      | 35.8746 | 35.2211 | 40      | 40      | 40      | 40      | 40      | 0.33333333 | 0.019098955 | 0.012141896 | 0.33333333  |
| mmu-miR-653       | 40      | 40      | 35.12   | 40      | 40      | 40      | 40      | 40      | 0.33333333 | 0.33333333  | 0.011320155 | 0.33333333  |
| mmu-miR-717       | 40      | 40      | 40      | 36.383  | 40      | 40      | 40      | 40      | 0.33333333 | 0.33333333  | 0.33333333  | 0.027167724 |
| mmu-miR-878-5p    | 40      | 40      | 36.0543 | 40      | 40      | 40      | 40      | 40      | 0.33333333 | 0.33333333  | 0.021632399 | 0.33333333  |
| mmu-miR-497       | 36.2916 | 40      | 40      | 35.2838 | 40      | 40      | 40      | 40      | 0.02549994 | 0.33333333  | 0.33333333  | 0.012681221 |
| mmu-miR-297b-5p   | 36.2218 | 40      | 40      | 40      | 40      | 40      | 40      | 40      | 0.02429558 | 0.33333333  | 0.33333333  | 0.33333333  |
| mmu-miR-879       | 36.1441 | 40      | 40      | 40      | 40      | 40      | 40      | 40      | 0.02302169 | 0.33333333  | 0.33333333  | 0.33333333  |
| mmu-miR-143       | 36.1293 | 35.2452 | 36.2706 | 40      | 40      | 40      | 40      | 40      | 0.02278673 | 0.012346428 | 0.025131446 | 0.33333333  |
| mmu-miR-485*      | 36.108  | 40      | 40      | 34.672  | 40      | 40      | 40      | 40      | 0.02245277 | 0.33333333  | 0.33333333  | 0.008298334 |
| mmu-miR-592       | 36.03   | 40      | 40      | 36.06   | 40      | 40      | 40      | 40      | 0.02127109 | 0.33333333  | 0.33333333  | 0.021718037 |
| mmu-miR-665       | 35.9634 | 40      | 37.3969 | 40      | 40      | 40      | 40      | 40      | 0.02031146 | 0.33333333  | 0.054861486 | 0.33333333  |
| mmu-miR-434-5p    | 35.8388 | 40      | 40      | 40      | 40      | 40      | 40      | 40      | 0.01863085 | 0.33333333  | 0.33333333  | 0.33333333  |
| mmu-miR-101a*     | 35.596  | 40      | 40      | 40      | 40      | 40      | 40      | 40      | 0.015745   | 0.33333333  | 0.33333333  | 0.33333333  |
| mmu-miR-376c      | 35.275  | 40      | 40      | 35.125  | 40      | 40      | 40      | 40      | 0.01260411 | 0.33333333  | 0.33333333  | 0.011359456 |
| mmu-miR-9         | 35.1553 | 40      | 40      | 40      | 40      | 40      | 40      | 40      | 0.01160055 | 0.33333333  | 0.33333333  | 0.33333333  |
| mmu-miR-9*        | 35.154  | 40      | 40      | 40      | 40      | 40      | 40      | 40      | 0.01159011 | 0.33333333  | 0.33333333  | 0.33333333  |
| mmu-miR-182       | 34.9392 | 40      | 33.9858 | 40      | 40      | 40      | 40      | 40      | 0.0099868  | 0.33333333  | 0.005157321 | 0.33333333  |
| mmu-miR-337-5p    | 34.746  | 40      | 38.1127 | 40      | 40      | 40      | 40      | 40      | 0.00873509 | 0.33333333  | 0.090104158 | 0.33333333  |
| mmu-miR-376a      | 34.6674 | 40      | 40      | 40      | 40      | 40      | 40      | 40      | 0.00827192 | 0.33333333  | 0.33333333  | 0.33333333  |
| mmu-miR-501-5p    | 34.483  | 36.71   | 40      | 40      | 40      | 40      | 40      | 40      | 0.00727941 | 0.034079252 | 0.33333333  | 0.33333333  |
| mmu-miR-701       | 34.244  | 34.258  | 35.787  | 40      | 40      | 40      | 40      | 40      | 0.00616808 | 0.006228228 | 0.017973778 | 0.33333333  |
| mmu-miR-132       | 33.6894 | 40      | 40      | 32.0051 | 40      | 40      | 40      | 40      | 0.00419951 | 0.33333333  | 0.33333333  | 0.001306694 |
| mmu-miR-200a*     | 33.475  | 29.166  | 40      | 40      | 40      | 40      | 40      | 40      | 0.00361958 | 0.000182608 | 0.33333333  | 0.33333333  |
| mmu-miR-376b*     | 33.417  | 40      | 40      | 40      | 40      | 40      | 40      | 40      | 0.00347695 | 0.33333333  | 0.33333333  | 0.33333333  |
| mmu-miR-429       | 33.3828 | 35.0098 | 35.696  | 34.2843 | 40      | 40      | 40      | 40      | 0.00339549 | 0.010487666 | 0.016875072 | 0.006342808 |
| mmu-miR-92a*      | 32.949  | 40      | 40      | 40      | 40      | 40      | 40      | 40      | 0.00251372 | 0.33333333  | 0.33333333  | 0.33333333  |
| mmu-miR-411       | 32.6991 | 34.1268 | 40      | 35.6962 | 40      | 40      | 40      | 40      | 0.00211392 | 0.005686819 | 0.33333333  | 0.016877412 |
| mmu-miR-27b*      | 32.649  | 31.476  | 33.178  | 35.102  | 40      | 40      | 40      | 40      | 0.00204177 | 0.000905522 | 0.002946131 | 0.011179795 |
| mmu-miR-32        | 32.5898 | 35.0722 | 33.8831 | 33.6168 | 40      | 40      | 40      | 40      | 0.00195969 | 0.010951236 | 0.004802953 | 0.003993412 |
| mmu-miR-330*      | 32.563  | 34.16   | 32.131  | 34.594  | 40      | 40      | 40      | 40      | 0.00192362 | 0.005819204 | 0.00142585  | 0.007861594 |
| mmu-miR-379       | 32.4739 | 33.489  | 40      | 35.7872 | 40      | 40      | 40      | 40      | 0.00180841 | 0.003654874 | 0.33333333  | 0.01797627  |
| mmu-miR-200b      | 31.1679 | 33.4597 | 32.9635 | 32.1893 | 40      | 40      | 40      | 40      | 0.00073139 | 0.003581395 | 0.002539108 | 0.001484649 |
| mmu-miR-28*       | 30.794  | 32.031  | 33.343  | 31.602  | 40      | 40      | 40      | 40      | 0.00056441 | 0.001330365 | 0.003303103 | 0.000988164 |
| mmu-miR-10b       | 28.2336 | 34.1619 | 29.7746 | 28.7284 | 40      | 40      | 40      | 40      | 9.5684E-05 | 0.005826873 | 0.000278437 | 0.000134831 |
| mmu-miR-466d-3p   | 26.477  | 40      | 40      | 40      | 40      | 40      | 40      | 40      | 2.8317E-05 | 0.33333333  | 0.33333333  | 0.33333333  |
| mmu-miR-699       | 25.837  | 26.135  | 26.166  | 27.171  | 24.263  | 26.342  | 28.205  | 29.213  | 0.99243017 | 0.288778952 | 0.081110781 | 0.080942291 |
| mmu-miR-801       | 27.168  | 25.974  | 25.938  | 25.398  | 28.548  | 26.128  | 27.183  | 26.284  | 0.12807293 | 0.299585042 | 0.140635966 | 0.180370774 |
| mmu-miR-805       | 26.359  | 25.239  | 28.599  | 30.847  | 29.538  | 29.135  | 32.588  | 31.124  | 0.03680479 | 0.022390608 | 0.020992787 | 0.275101803 |
| mmu-miR-720       | 22.445  | 22.626  | 20.657  | 21.053  | 27.298  | 25.48   | 26.179  | 25.562  | 0.01153401 | 0.046104056 | 0.007254226 | 0.014639778 |
| mmu-miR-685       | 33.1571 | 32.8285 | 30.6907 | 31.6102 | 34.0142 | 30.7108 | 32.0173 | 30.6332 | 0.18402039 | 1.446671638 | 0.132902256 | 0.656122681 |
| mmu-miR-197       | 40      | 36.4647 | 34.7061 | 35.284  | 35.0739 | 34.672  | 40      | 38.0761 | 10.1340398 | 1.154875634 | 0.008496813 | 0.048125238 |
| mmu-miR-715       | 40      | 40      | 40      | 40      | 40      | 31.604  | 34.821  | 40      | 0.33333333 | 112.2862528 | 12.07572162 | 0.33333333  |

Note: in red; miRNAs that have been removed from MiRbase
